# Supplementary material for: Unprecedented metal–metal bonded {Ru4(μ3-O)2} butterfly core in oxido-carboxylato bridged mixed valence cluster—structural elucidation and electronic forms in accessible redox states
Source: Royal Society of Chemistry journal article supplement (doi:10.1039/d0dt02741c), 2020-01-01
Supplement: d0dt02741c1.pdf [file d0dt02741c1.pdf]

**Supporting Information**

**Unprecedented metal-metal bonded  $\{\text{Ru}_4(\mu_3\text{-O})_2\}$  butterfly core in oxido-carboxylato bridged mixed valent cluster. Structural elucidation and electronic forms in accessible redox states**

Sudip Kumar Bera, and Goutam Kumar Lahiri\*

<sup>a</sup>*Department of Chemistry, Indian Institute of Technology Bombay, Powai, Mumbai-400076,*

*India, E-mail: [lahiri@chem.iitb.ac.in](mailto:lahiri@chem.iitb.ac.in)*

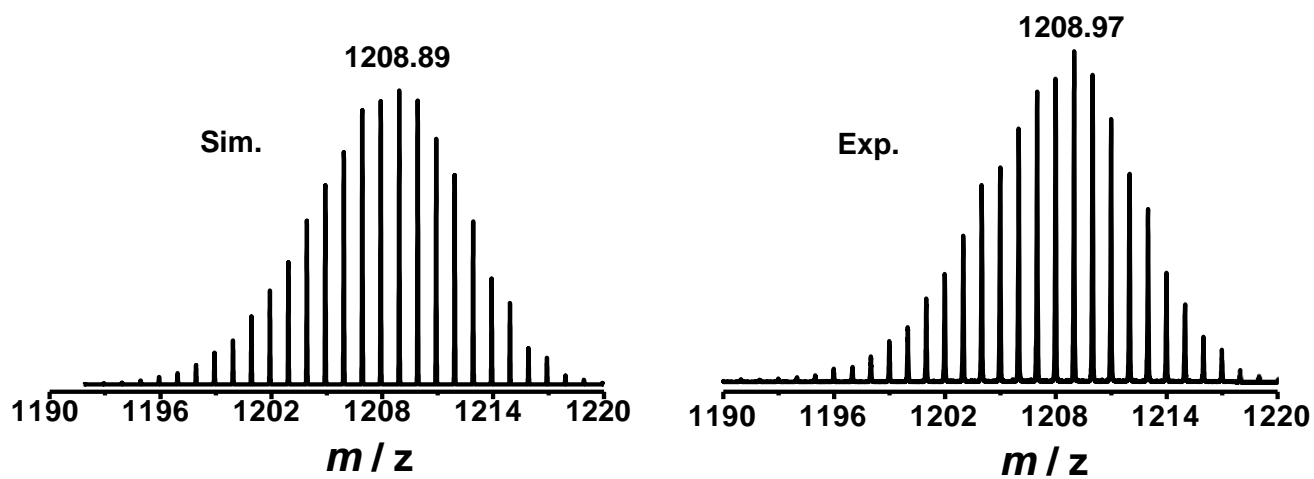

**Fig. S1** Experimental and simulated ESI(+) mass spectra of  $\{1\}^+$  in  $\text{CH}_3\text{CN}$

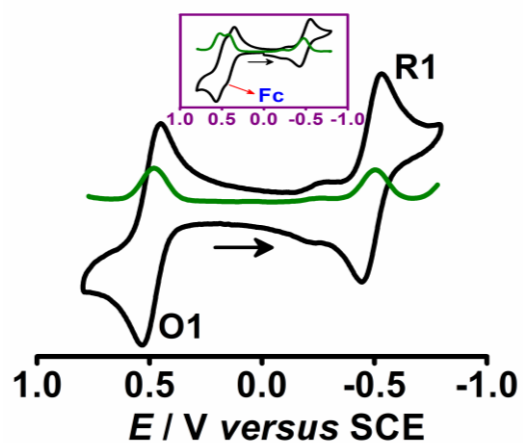

**Fig. S2** Cyclic (black) and differential pulse (green) voltammograms of **1** in CH<sub>3</sub>CN. Inset shows one-electron transfer process in **1** with reference to ferrocene as an internal standard in CH<sub>3</sub>CN

**Table S1** Selected crystallographic data for **1**

|                                                 |                                                                 |
|-------------------------------------------------|-----------------------------------------------------------------|
| complex                                         | <b>1</b>                                                        |
| empirical formula                               | C <sub>36</sub> H <sub>51</sub> O <sub>20</sub> Ru <sub>4</sub> |
| formula weight                                  | 1208.04                                                         |
| crystal system                                  | triclinic                                                       |
| space group                                     | <i>C12/C1</i>                                                   |
| <i>a</i> (Å)                                    | 11.8572(3)                                                      |
| <i>b</i> (Å)                                    | 13.8306(3)                                                      |
| <i>c</i> (Å)                                    | 14.3293(3)                                                      |
| $\alpha$ (deg)                                  | 74.4373(18)                                                     |
| $\beta$ (deg)                                   | 89.4963(17)                                                     |
| $\gamma$ (deg)                                  | 80.0332(19)                                                     |
| <i>V</i> (Å <sup>3</sup> )                      | 2227.82(9)                                                      |
| <i>Z</i>                                        | 2                                                               |
| $\mu$ (mm <sup>-1</sup> )                       | 1.405                                                           |
| <i>T</i> (K)                                    | 150(2)                                                          |
| <i>D</i> <sub>calcd</sub> (g cm <sup>-3</sup> ) | 1.664                                                           |
| <i>F</i> (000)                                  | 1206                                                            |
| $\theta$ range (deg)                            | 2.330 to 24.998                                                 |
| data/restraints/<br>parameters                  | 7823 / 0 / 556                                                  |
| R1, wR2 [ <i>I</i> > 2 $\sigma$ ( <i>I</i> )]   | 0.0438, 0.0582                                                  |
| R1, wR2(all data)                               | 0.0910, 0.0990                                                  |
| GOF                                             | 1.049                                                           |
| largest diff. peak/hole, (e Å <sup>-3</sup> )   | 0.741 / -0.759                                                  |

**Table S2** Selected experimental and DFT calculated bond lengths (Å) for **1**

| X-ray     |           | DFT   |
|-----------|-----------|-------|
| Ru1-O1    | 1.906(3)  | 1.907 |
| Ru1-O3    | 2.078(3)  | 2.109 |
| Ru1-O9    | 1.998(3)  | 2.047 |
| Ru1-O10   | 2.004(3)  | 2.056 |
| Ru1-O11   | 2.011(3)  | 2.055 |
| Ru1-O12   | 2.027(3)  | 2.075 |
| Ru2-O1    | 1.944(3)  | 1.980 |
| Ru2-O2    | 1.940(3)  | 1.984 |
| Ru2-O4    | 2.028(3)  | 2.095 |
| Ru2-O5    | 2.072(3)  | 2.128 |
| Ru2-O13   | 2.000(3)  | 2.055 |
| Ru2-O14   | 2.007(3)  | 2.056 |
| Ru3-O1    | 1.950(3)  | 1.986 |
| Ru3-O2    | 1.934(3)  | 1.977 |
| Ru3-O6    | 2.060(3)  | 2.137 |
| Ru3-O7    | 2.048(3)  | 2.096 |
| Ru3-O15   | 2.000(3)  | 2.053 |
| Ru3-O16   | 2.029(4)  | 2.061 |
| Ru4-O2    | 1.907(3)  | 1.906 |
| Ru4-O8    | 2.066(4)  | 2.111 |
| Ru4-O17   | 1.993(4)  | 2.044 |
| Ru4-O18   | 1.992(4)  | 2.059 |
| Ru4-O19   | 1.999(3)  | 2.055 |
| Ru4-O20   | 2.029(4)  | 2.076 |
| C31-O3    | 1.258(6)  | 1.263 |
| C31-O4    | 1.265(6)  | 1.274 |
| C33-O5    | 1.265(6)  | 1.270 |
| C33-O6    | 1.260(6)  | 1.269 |
| C35-O7    | 1.263(6)  | 1.274 |
| C35-O8    | 1.256(7)  | 1.264 |
| Ru2-Ru3   | 2.5187(6) | 2.577 |
| Ru1---Ru2 | 3.507     | 3.544 |
| Ru1---Ru3 | 3.705     | 3.737 |
| Ru1---Ru4 | 6.743     | 6.805 |
| Ru2---Ru4 | 3.688     | 3.735 |
| Ru3---Ru4 | 3.507     | 3.538 |

**Table S3** Selected experimental and DFT calculated bond angles (deg) for **1**

| <b>1</b>    |            |        |
|-------------|------------|--------|
| X-ray       |            | DFT    |
| O9-Ru1-O10  | 94.87(13)  | 94.46  |
| O9-Ru1-O11  | 88.03(13)  | 87.07  |
| O9-Ru1-O12  | 178.55(13) | 177.15 |
| O10-Ru1-O11 | 89.19(13)  | 88.33  |
| O10-Ru1-O12 | 84.67(13)  | 87.32  |
| O11-Ru1-O12 | 90.59(13)  | 90.77  |
| O13-Ru2-O14 | 93.45(14)  | 92.21  |
| O15-Ru3-O16 | 93.45(14)  | 92.26  |
| O17-Ru4-O18 | 94.61(16)  | 94.10  |
| O17-Ru4-O19 | 86.04(15)  | 87.56  |
| O17-Ru4-O20 | 176.88(14) | 176.89 |
| O18-Ru4-O19 | 90.43(14)  | 89.52  |
| O18-Ru4-O20 | 86.31(15)  | 86.75  |
| O19-Ru4-O20 | 90.97(15)  | 90.64  |
| Ru1-O1-Ru2  | 131.24(17) | 131.46 |
| Ru1-O1-Ru3  | 147.83(18) | 147.46 |
| Ru2-O2-Ru4  | 147.02(19) | 147.49 |
| Ru3-O2-Ru4  | 131.84(17) | 131.31 |
| Ru2-O1-Ru3  | 80.61(11)  | 81.055 |
| Ru2-O2-Ru3  | 81.11(12)  | 81.17  |
| Ru2-O2-Ru4  | 147.02(19) | 147.49 |
| Ru3-O2-Ru4  | 131.84(17) | 131.31 |

**Table S4** Energy calculations ((U)/(R)B3LYP /LanL2DZ/6-31G\*)

| complex              | <i>E</i> (Hartrees) |                |              |                                   |              |                      | $\Delta E_{(\text{HE-LE})}^{\text{a}}$         |
|----------------------|---------------------|----------------|--------------|-----------------------------------|--------------|----------------------|------------------------------------------------|
|                      | <i>S</i> = 1/2      | <i>S</i> = 3/2 | <i>S</i> = 0 | BS(1,1) <i>S</i> = 0 <sup>b</sup> | <i>S</i> = 1 | BS(1,1) <i>S</i> = 1 |                                                |
| <b>1</b>             | -3283.02898         | -3283.02099    | -            | -                                 | -            | -                    | 0.00799 Hartrees<br>1453.6023 cm <sup>-1</sup> |
| <b>1<sup>+</sup></b> | -                   | -              | -3282.8111   | -3282.8171                        | -3282.8158   | -3282.8138           | 0.00326 Hartrees<br>715.48729 cm <sup>-1</sup> |
| <b>1<sup>-</sup></b> | -                   | -              | -3283.0976   | -3283.1262                        | -3283.1260   | -3283.1164           | 0.0098 Hartrees<br>2150.8510 cm <sup>-1</sup>  |

<sup>a</sup>HE = Spin state in higher in energy and LE = Spin state in lower in energy

<sup>b</sup>Spin up and spin down electrons at the two interacting fragments

**Table S5** DFT calculated selected MO compositions for **1** in  $S = 1/2$  state (UB3LYP/  
LanL2DZ/6-31G\*)

| MO           | energy (eV) | % composition |      |       |         |
|--------------|-------------|---------------|------|-------|---------|
|              |             | Ru            | acac | oxido | acetate |
| $\alpha$ -MO |             |               |      |       |         |
| LUMO+5       | -0.584      | 12            | 85   | 01    | 02      |
| LUMO+4       | -0.605      | 09            | 89   | 00    | 02      |
| LUMO+3       | -0.636      | 15            | 82   | 02    | 01      |
| LUMO+2       | -0.684      | 06            | 93   | 01    | 01      |
| LUMO+1       | -2.253      | 74            | 08   | 15    | 03      |
| LUMO         | -3.065      | 65            | 08   | 24    | 03      |
| SOMO         | -4.773      | 57            | 21   | 17    | 06      |
| HOMO-1       | -4.976      | 68            | 19   | 03    | 09      |
| HOMO-2       | -5.201      | 65            | 28   | 01    | 07      |
| HOMO-3       | -5.252      | 60            | 34   | 02    | 04      |
| HOMO-4       | -5.323      | 64            | 29   | 00    | 07      |
| HOMO-5       | -5.417      | 58            | 36   | 01    | 05      |
| $\beta$ -MO  |             |               |      |       |         |
| LUMO+5       | -0.587      | 11            | 85   | 01    | 03      |
| LUMO+4       | -0.610      | 18            | 77   | 02    | 03      |
| LUMO+3       | -0.691      | 05            | 93   | 01    | 01      |
| LUMO+2       | -2.244      | 70            | 16   | 13    | 01      |
| LUMO+1       | -2.322      | 71            | 17   | 11    | 02      |
| LUMO         | -2.386      | 73            | 08   | 16    | 03      |
| HOMO         | -4.986      | 64            | 30   | 02    | 04      |
| HOMO-1       | -5.026      | 66            | 28   | 01    | 05      |
| HOMO-2       | -5.102      | 70            | 21   | 01    | 08      |
| HOMO-3       | -5.194      | 70            | 16   | 05    | 09      |
| HOMO-4       | -5.318      | 67            | 25   | 04    | 05      |
| HOMO-5       | -5.417      | 76            | 16   | 05    | 03      |



| $\alpha$ -MO                                                                        |                                                                                     |                                                                                      |                                                                                       |
|-------------------------------------------------------------------------------------|-------------------------------------------------------------------------------------|--------------------------------------------------------------------------------------|---------------------------------------------------------------------------------------|
| 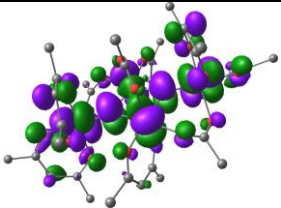   |    |    |    |
| SOMO                                                                                | HOMO-1                                                                              | HOMO-2                                                                               | HOMO-3                                                                                |
|    |    |    |    |
| LUMO                                                                                | LUMO+1                                                                              | LUMO+2                                                                               | LUMO+3                                                                                |
| $\beta$ -MO                                                                         |                                                                                     |                                                                                      |                                                                                       |
|   |   |   |   |
| HOMO                                                                                | HOMO-1                                                                              | HOMO-2                                                                               | HOMO-3                                                                                |
|  |  |  |  |
| LUMO                                                                                | LUMO+1                                                                              | LUMO+2                                                                               | LUMO+3                                                                                |

**Table S6** DFT calculated selected MO compositions for  $1^+$  in  $S = 0$  state (RB3LYP/LanL2DZ/6-31G\*)

| MO     | energy (eV) | % composition |      |       |         |
|--------|-------------|---------------|------|-------|---------|
|        |             | Ru            | acac | oxido | acetate |
| LUMO+5 | -3.660      | 11            | 86   | 01    | 02      |
| LUMO+4 | -3.876      | 58            | 25   | 06    | 11      |
| LUMO+3 | -4.106      | 58            | 29   | 02    | 11      |
| LUMO+2 | -4.208      | 62            | 21   | 07    | 10      |
| LUMO+1 | -5.605      | 75            | 07   | 15    | 03      |
| LUMO   | -6.477      | 63            | 18   | 17    | 02      |
| HOMO   | -7.984      | 56            | 30   | 10    | 04      |
| HOMO-1 | -8.117      | 40            | 51   | 01    | 08      |
| HOMO-2 | -8.301      | 56            | 35   | 04    | 05      |
| HOMO-3 | -8.431      | 52            | 37   | 07    | 04      |
| HOMO-4 | -8.530      | 32            | 57   | 02    | 08      |
| HOMO-5 | -8.584      | 36            | 59   | 02    | 03      |

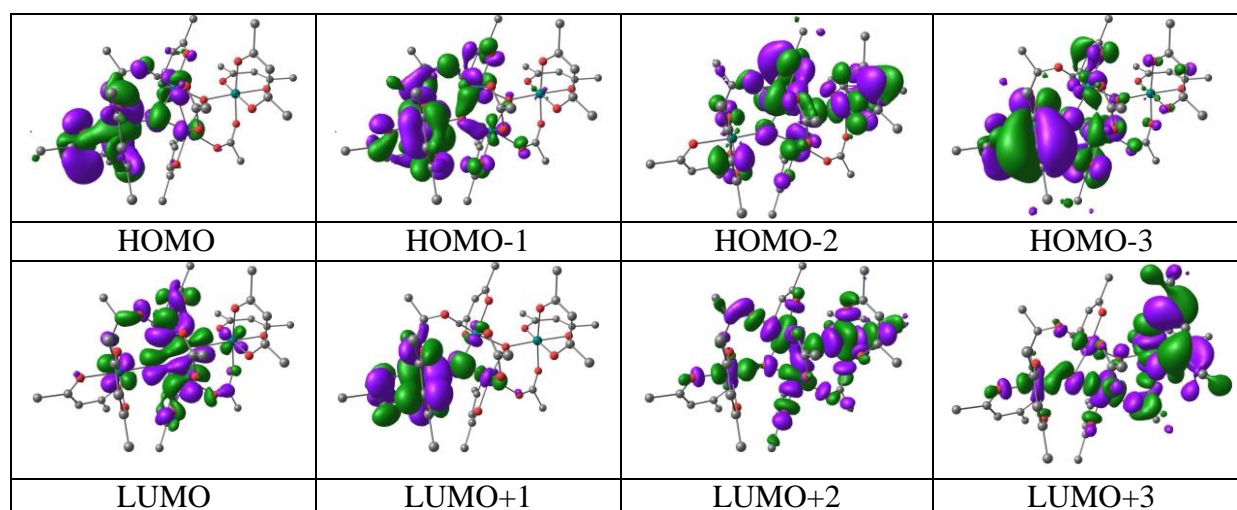

**Table S7** DFT calculated selected MO compositions for  $\mathbf{1}^-$  in  $S = 0$  state (RB3LYP/LanL2DZ/6-31G\*)

| MO     | energy (eV) | % composition |      |       |         |
|--------|-------------|---------------|------|-------|---------|
|        |             | Ru            | acac | oxido | acetate |
| LUMO+5 | 1.925       | 04            | 95   | 00    | 00      |
| LUMO+4 | 1.839       | 15            | 84   | 00    | 01      |
| LUMO+3 | 1.804       | 18            | 81   | 00    | 01      |
| LUMO+2 | 1.680       | 07            | 92   | 00    | 00      |
| LUMO+1 | 1.666       | 07            | 92   | 00    | 01      |
| LUMO   | 0.613       | 73            | 10   | 14    | 03      |
| HOMO   | -1.719      | 66            | 09   | 23    | 02      |
| HOMO-1 | -2.141      | 60            | 18   | 17    | 05      |
| HOMO-2 | -2.308      | 82            | 10   | 00    | 08      |
| HOMO-3 | -2.446      | 67            | 22   | 01    | 10      |
| HOMO-4 | -2.525      | 70            | 22   | 04    | 04      |
| HOMO-5 | -2.551      | 68            | 27   | 01    | 04      |

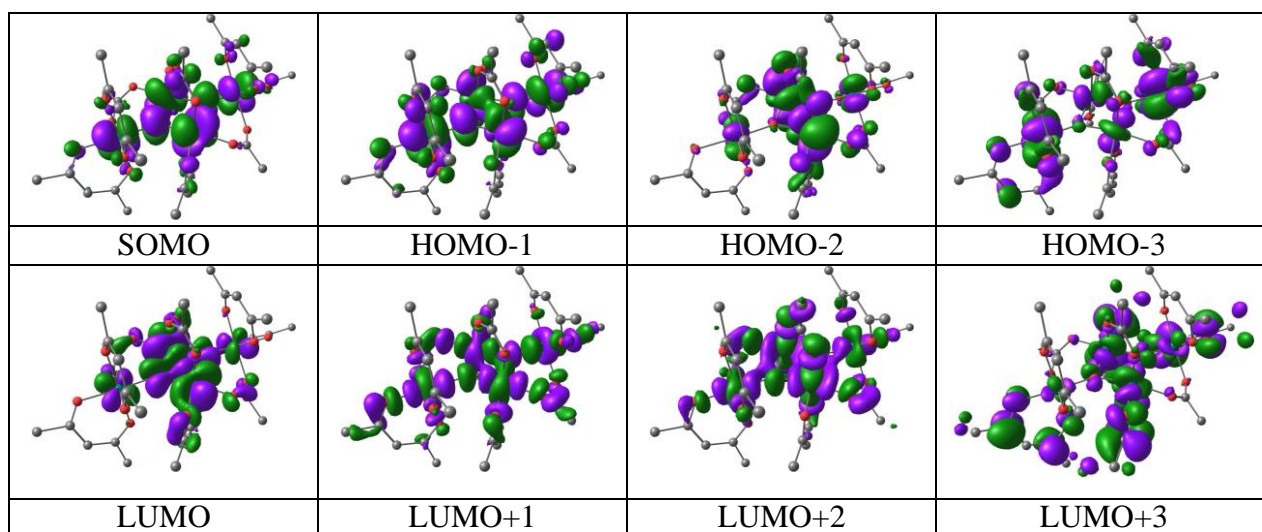

**Table S8** Electronic spectral data in CH<sub>3</sub>CN

| complex               | $\lambda$ / nm ( $\epsilon$ /dm <sup>3</sup> cm <sup>-1</sup> mol <sup>-1</sup> ) |
|-----------------------|-----------------------------------------------------------------------------------|
| <b>1</b> <sup>+</sup> | 272(8800), 335(5300), 601(2400), 775(3600), 1156(890)                             |
| <b>1</b>              | 274(19600), 355(9600), 598(8000), 1350(880)                                       |
| <b>1</b> <sup>-</sup> | 272(10500), 361(8800), 365(4500), 600(2800)                                       |
